# Supplementary material for: Developmental and physiological responses of Brachypodium distachyon to fluctuating nitrogen availability
Source: PubMed Central journal article supplement (PMC6405861; doi:10.1038/s41598-019-40569-8), 2019-03-07
Supplement: 41598_2019_40569_MOESM1_ESM.pdf [file 41598_2019_40569_MOESM1_ESM.pdf]

**Developmental and physiological responses of *Brachypodium distachyon* to fluctuating nitrogen availability**

David LC<sup>+</sup>, Girin T<sup>+\*</sup>, Fleurisson E, Phommabouth E, Mahfoudhi A, Citerne S., Berquin P, Daniel-Vedele F, Krapp A, Ferrario-Méry S.

Institut Jean-Pierre Bourgin, INRA, AgroParisTech, CNRS, Université Paris-Saclay, RD10, 78026 Versailles, France

<sup>+</sup> These authors contributed equally to this work

\* corresponding author: [thomas.girin@inra.fr](mailto:thomas.girin@inra.fr)

**SUPPLEMENTARY INFORMATION**

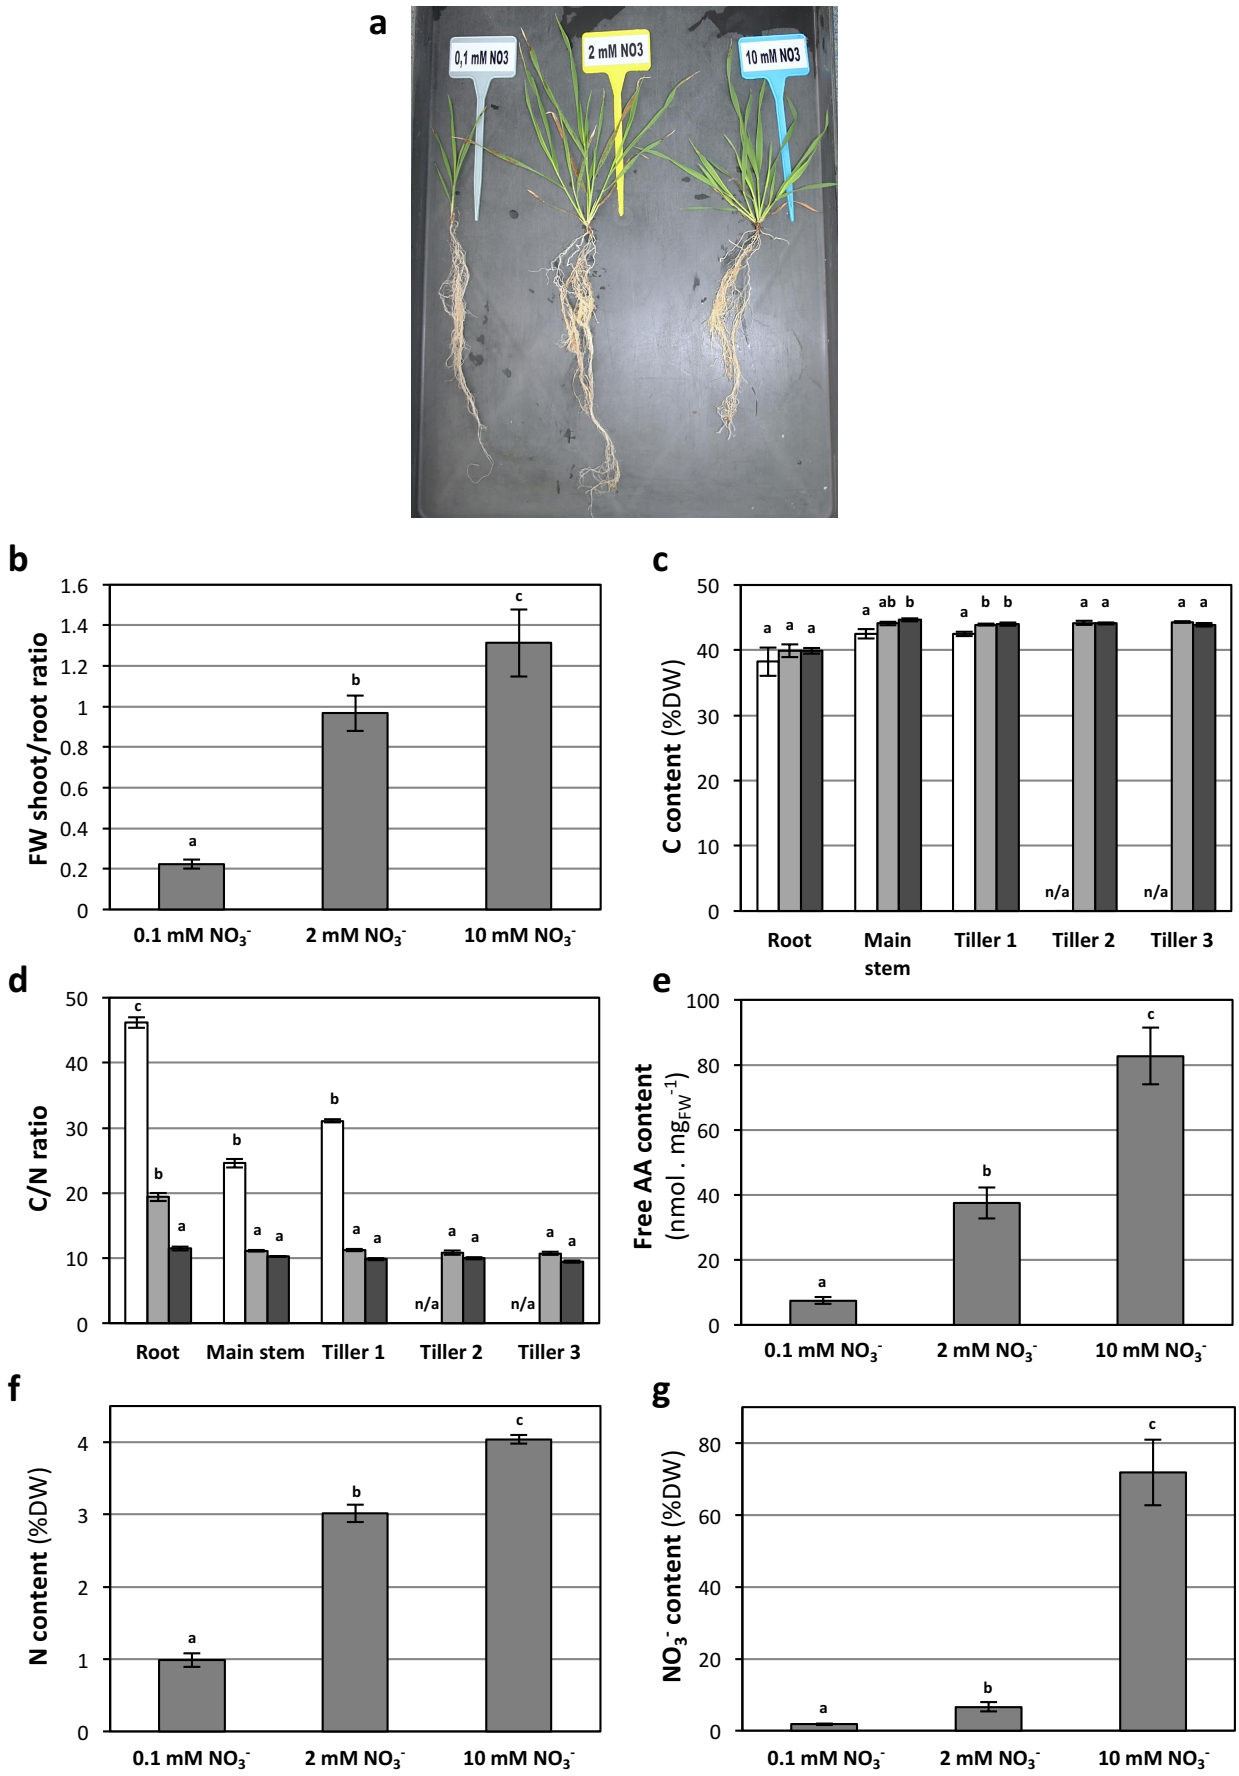

**Figure S1: Effects of NO<sub>3</sub><sup>-</sup> availability at vegetative stage.** Plants were grown on sand for 35 days, watered with nutritive solution containing 0.1, 2 or 10 mM NO<sub>3</sub><sup>-</sup>. **(a)** Pictures of representative plants grown on the 3 conditions. **(b)** Fresh weight shoot/root ratio in the 3 conditions. **(c)** C content and **(d)** C/N ratio of main stem and tillers. **(e)** Free AA content, **(f)** N content and **(g)** NO<sub>3</sub><sup>-</sup> content of the whole plant in the 3 conditions. Values correspond to the mean of 4 or 5 biological replicates (2 plants each) +/-SD. Letters indicate statistical groups for each condition (panels b, e-g) or plant part (panels c,d) (Non-parametric ANOVA, p < 0.05). N/a: no data available, due to the lack of development of tillers 2 and 3 in the 0.1 mM NO<sub>3</sub><sup>-</sup> condition.

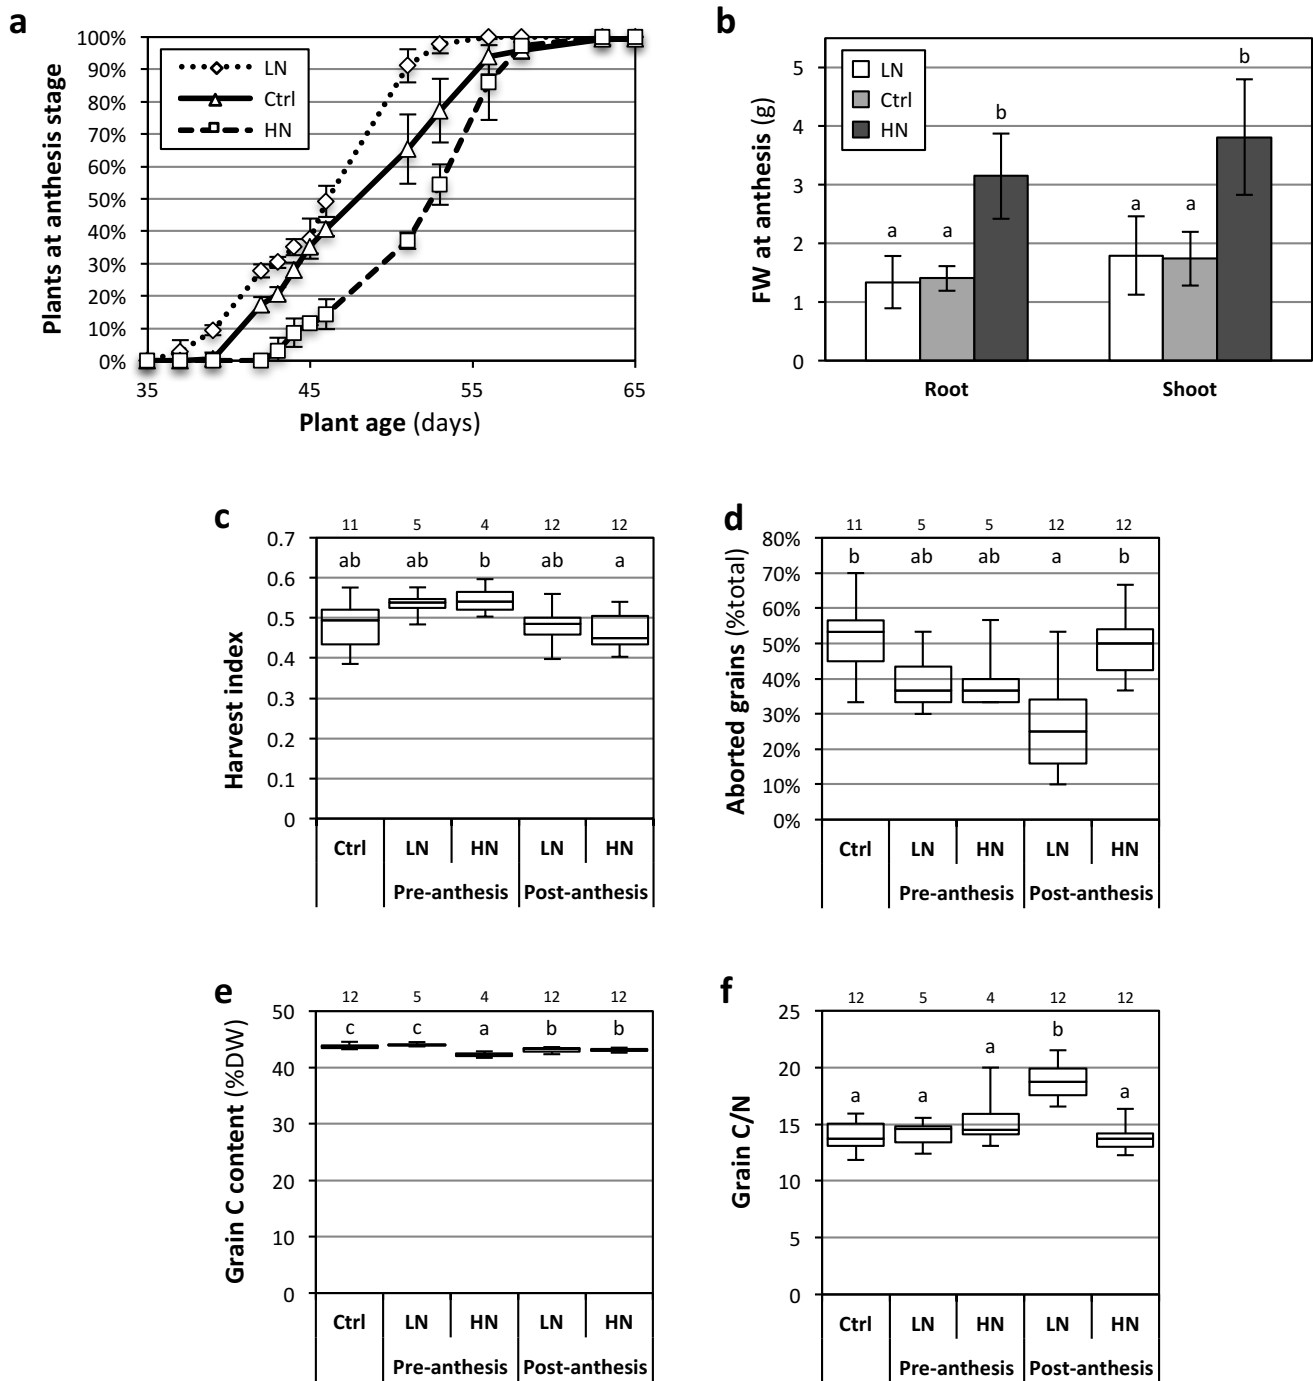

**Figure S2: Effects of  $\text{NO}_3^-$  availability on anthesis characteristics and harvest index.** Growing conditions and treatments were as described in Figure 2. LN, Ctrl and HN: 0.1, 1 and 10 mM  $\text{NO}_3^-$ , respectively. **(a)** Kinetics of anthesis. Values are means of 2 hydroponical tanks (LN condition; total of 43 plants), 8 tanks (C; 149 plants) and 2 tanks (HN; 35 plants)  $\pm$  SD. **(b)** Root and shoot FW at anthesis stage. Values are means of 15 plants  $\pm$  SD. **(c)** Grain harvest index (grain DW / total above-ground DW) at the end of the cycle. **(d)** Percentage of aborted grains. **(e)** Grain C content. **(f)** Grain C/N ratio. The boxplots represent minimum, 1<sup>st</sup> quartile, median, 3<sup>rd</sup> quartile and maximum values. Number of biological replicates for each condition are indicated above the boxplots. Letters indicate statistical groups (Non-parametric ANOVA,  $p < 0.05$ ).

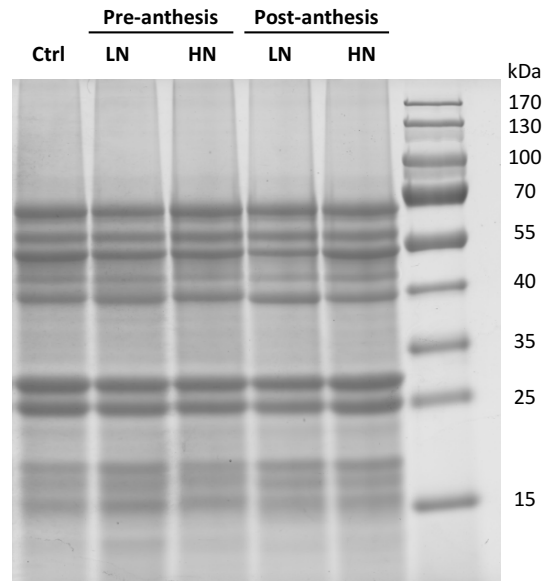

**Figure S3: Effects of pre- and post-anthesis  $\text{NO}_3^-$  availability on grain protein composition analyzed by SDS PAGE electrophoresis.** Growing conditions and treatments were as described in Figure 2. LN, Ctrl and HN: 0.1, 1 and 10 mM  $\text{NO}_3^-$ , respectively. Extractable proteins were separated on a 10% SDS PAGE gel and visualized by Coomassie blue staining. The same total protein quantity ( $50 \mu\text{g}$ ) was loaded in each lane in order to compare the relative composition of proteins between the treatments. The estimated size of each molecular weight marker band (kDa) is indicated on the right of the figure.

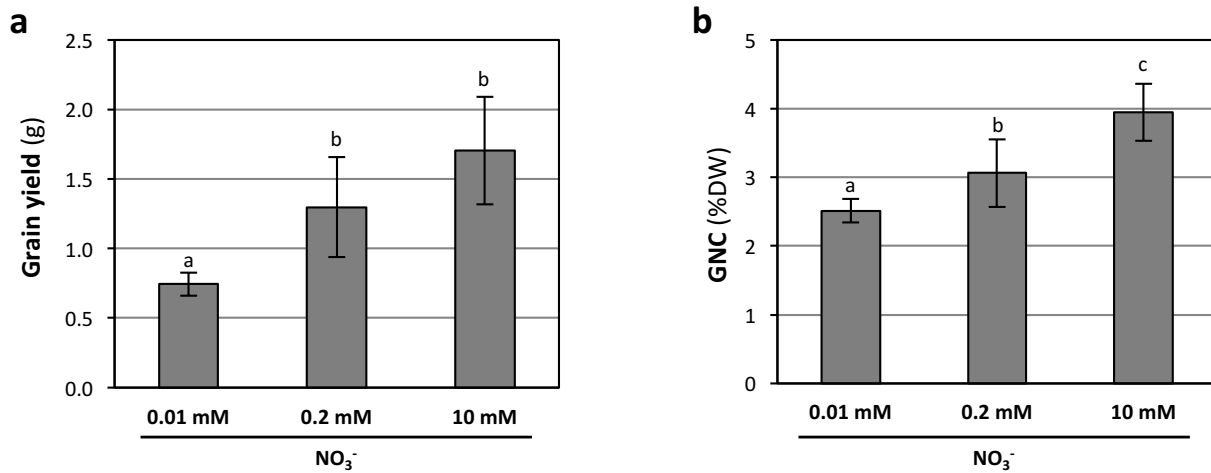

**Figure S4: Effects of post-flowering NO<sub>3</sub><sup>-</sup> availability on grain yield and Grain Nitrogen Content.** Plants were grown in hydroponics on 0.2 mM NO<sub>3</sub><sup>-</sup> and transferred at anthesis on 0.01, 0.2 or 10 mM NO<sub>3</sub><sup>-</sup>. **(a)** Grain yield per plant. **(b)** Grain Nitrogen Content (GNC). Values correspond to the mean of 5 (0.01 mM NO<sub>3</sub><sup>-</sup> condition) or 7 (0.2 and 10 mM NO<sub>3</sub><sup>-</sup> conditions) biological replicates +/-SD. Letters indicate statistical groups (Non-parametric ANOVA,  $p < 0.05$ ).

**Table S1: Effects of pre- and post-anthesis NO<sub>3</sub><sup>-</sup> availability on grain free AA composition**

|      | Ctrl                                      |      |                                      |       | LN pre-anthesis                           |      |                                      |       | HN pre-anthesis                           |      |                                      |       | LN post-anthesis                          |      |                                      |       | HN post-anthesis                          |      |                                      |       |
|------|-------------------------------------------|------|--------------------------------------|-------|-------------------------------------------|------|--------------------------------------|-------|-------------------------------------------|------|--------------------------------------|-------|-------------------------------------------|------|--------------------------------------|-------|-------------------------------------------|------|--------------------------------------|-------|
|      | Free AA content (nmol/mg <sub>DDW</sub> ) |      | Free AA proportion (% total free AA) |       | Free AA content (nmol/mg <sub>DDW</sub> ) |      | Free AA proportion (% total free AA) |       | Free AA content (nmol/mg <sub>DDW</sub> ) |      | Free AA proportion (% total free AA) |       | Free AA content (nmol/mg <sub>DDW</sub> ) |      | Free AA proportion (% total free AA) |       | Free AA content (nmol/mg <sub>DDW</sub> ) |      | Free AA proportion (% total free AA) |       |
|      | mean value                                | SD   | mean value                           | SD    | mean value                                | SD   | mean value                           | SD    | mean value                                | SD   | mean value                           | SD    | mean value                                | SD   | mean value                           | SD    | mean value                                | SD   | mean value                           | SD    |
| ALA  | 1.33                                      | 0.20 | 5.41%                                | 0.73% | 1.37                                      | 0.27 | 6.55%                                | 1.39% | 1.70                                      | 0.41 | 6.68%                                | 1.12% | 2.47                                      | 0.84 | 10.27%                               | 3.00% | 1.02                                      | 0.17 | 6.67%                                | 1.18% |
| ARG  | 1.58                                      | 0.71 | 6.13%                                | 1.45% | 1.27                                      | 0.66 | 5.60%                                | 1.33% | 1.15                                      | 0.35 | 4.55%                                | 1.19% | 0.70                                      | 0.21 | 2.91%                                | 0.71% | 1.04                                      | 0.44 | 6.44%                                | 1.66% |
| ASN  | 10.76                                     | 2.14 | 43.49%                               | 3.18% | 8.73                                      | 3.95 | 39.25%                               | 7.21% | 8.37                                      | 2.37 | 33.25%                               | 8.59% | 6.40                                      | 1.52 | 26.79%                               | 5.45% | 6.79                                      | 1.03 | 43.80%                               | 3.12% |
| ASP  | 1.45                                      | 0.20 | 5.94%                                | 0.75% | 1.56                                      | 0.51 | 7.23%                                | 1.02% | 1.62                                      | 0.26 | 6.39%                                | 0.46% | 1.11                                      | 0.20 | 4.68%                                | 0.87% | 0.91                                      | 0.35 | 5.73%                                | 1.77% |
| GABA | 0.34                                      | 0.08 | 1.39%                                | 0.31% | 0.35                                      | 0.16 | 1.55%                                | 0.33% | 0.54                                      | 0.35 | 2.09%                                | 1.19% | 0.36                                      | 0.07 | 1.49%                                | 0.23% | 0.26                                      | 0.03 | 1.68%                                | 0.26% |
| GLN  | 1.50                                      | 0.63 | 5.83%                                | 1.25% | 1.26                                      | 0.69 | 5.46%                                | 1.38% | 1.87                                      | 0.42 | 7.35%                                | 1.06% | 2.50                                      | 0.36 | 10.49%                               | 1.10% | 0.77                                      | 0.37 | 4.70%                                | 1.48% |
| GLU  | 1.19                                      | 0.25 | 4.78%                                | 0.28% | 1.04                                      | 0.26 | 4.85%                                | 0.58% | 1.34                                      | 0.43 | 5.37%                                | 2.02% | 0.76                                      | 0.13 | 3.16%                                | 0.43% | 0.90                                      | 0.13 | 5.83%                                | 0.54% |
| GLY  | 0.32                                      | 0.16 | 1.28%                                | 0.48% | 0.24                                      | 0.03 | 1.16%                                | 0.25% | 0.25                                      | 0.02 | 0.98%                                | 0.09% | 0.32                                      | 0.10 | 1.36%                                | 0.42% | 0.20                                      | 0.03 | 1.30%                                | 0.25% |
| ILE  | 0.28                                      | 0.07 | 1.13%                                | 0.19% | 0.26                                      | 0.06 | 1.24%                                | 0.29% | 0.34                                      | 0.15 | 1.34%                                | 0.50% | 0.42                                      | 0.07 | 1.79%                                | 0.32% | 0.18                                      | 0.03 | 1.15%                                | 0.20% |
| LEU  | 0.29                                      | 0.07 | 1.19%                                | 0.13% | 0.27                                      | 0.05 | 1.27%                                | 0.27% | 0.37                                      | 0.17 | 1.43%                                | 0.59% | 0.39                                      | 0.06 | 1.62%                                | 0.26% | 0.18                                      | 0.04 | 1.19%                                | 0.19% |
| LYS  | 0.32                                      | 0.11 | 1.25%                                | 0.17% | 0.28                                      | 0.13 | 1.23%                                | 0.21% | 0.30                                      | 0.08 | 1.18%                                | 0.14% | 0.42                                      | 0.03 | 1.76%                                | 0.08% | 0.19                                      | 0.07 | 1.18%                                | 0.29% |
| ORN  | 0.15                                      | 0.14 | 0.55%                                | 0.45% | 0.06                                      | 0.04 | 0.25%                                | 0.08% | 0.07                                      | 0.03 | 0.21%                                | 0.14% | 0.12                                      | 0.04 | 0.50%                                | 0.12% | 0.04                                      | 0.02 | 0.24%                                | 0.07% |
| PHE  | 0.28                                      | 0.08 | 1.11%                                | 0.13% | 0.27                                      | 0.07 | 1.26%                                | 0.34% | 0.33                                      | 0.09 | 1.28%                                | 0.24% | 0.25                                      | 0.05 | 1.05%                                | 0.23% | 0.16                                      | 0.03 | 1.02%                                | 0.13% |
| PRO  | 2.95                                      | 0.77 | 11.81%                               | 1.68% | 3.17                                      | 1.19 | 14.70%                               | 4.30% | 4.38                                      | 1.84 | 16.87%                               | 5.34% | 0.95                                      | 0.30 | 3.92%                                | 1.01% | 1.81                                      | 0.63 | 11.38%                               | 2.41% |
| SER  | 0.79                                      | 0.36 | 3.10%                                | 0.98% | 0.56                                      | 0.18 | 2.54%                                | 0.22% | 0.80                                      | 0.26 | 3.11%                                | 0.74% | 1.56                                      | 0.19 | 6.56%                                | 0.96% | 0.41                                      | 0.03 | 2.67%                                | 0.34% |
| THR  | 0.49                                      | 0.08 | 2.00%                                | 0.23% | 0.43                                      | 0.14 | 1.99%                                | 0.26% | 0.58                                      | 0.19 | 2.24%                                | 0.54% | 0.78                                      | 0.08 | 3.28%                                | 0.44% | 0.31                                      | 0.04 | 1.99%                                | 0.33% |
| TRP  | 0.07                                      | 0.03 | 0.19%                                | 0.19% | 0.05                                      | 0.04 | 0.24%                                | 0.17% | 0.28                                      | 0.49 | 1.17%                                | 2.10% | 3.21                                      | 0.42 | 13.50%                               | 1.88% | 0.03                                      | 0.00 | 0.17%                                | 0.05% |
| TYR  | 0.15                                      | 0.05 | 0.60%                                | 0.21% | 0.14                                      | 0.03 | 0.66%                                | 0.12% | 0.17                                      | 0.06 | 0.69%                                | 0.19% | 0.20                                      | 0.04 | 0.85%                                | 0.17% | 0.10                                      | 0.01 | 0.64%                                | 0.17% |
| VAL  | 0.70                                      | 0.15 | 2.83%                                | 0.17% | 0.65                                      | 0.23 | 2.97%                                | 0.68% | 0.98                                      | 0.54 | 3.81%                                | 1.78% | 0.95                                      | 0.09 | 4.02%                                | 0.57% | 0.36                                      | 0.20 | 2.21%                                | 1.24% |

**Table S2: raw data for N fluxes calculation (Figure 5)**

| Plant number | Harvesting stage | NO <sub>3</sub> <sup>-</sup> condition | Note                                  | Root DW (mg) | Root <sup>15</sup> N abundance (%) | Root N content (%DW) | Shoot DW (mg) | Shoot <sup>15</sup> N abundance (%) | Shoot N content (%DW) | Spike DW (mg) | Spike <sup>15</sup> N abundance (%) | Spike N content (%DW) |
|--------------|------------------|----------------------------------------|---------------------------------------|--------------|------------------------------------|----------------------|---------------|-------------------------------------|-----------------------|---------------|-------------------------------------|-----------------------|
| 1            | Reproductive     | 0.01 mM                                |                                       | 71.7         | 0.382                              | 1.22                 | 94.6          | 0.367                               | 0.82                  | 148.0         | 0.366                               | 1.56                  |
| 2            | Reproductive     | 0.01 mM                                | For natural <sup>15</sup> N abundance | 141.7        | 0.368                              | 1.84                 | 345.7         | 0.368                               | 1.05                  | 374.3         | 0.367                               | 1.79                  |
| 3            | Reproductive     | 0.2 mM                                 | determination.                        | 247.2        | 0.367                              | 3.08                 | 831.6         | 0.368                               | 1.96                  | 720.5         | 0.366                               | 2.18                  |
| 4            | Reproductive     | 0.2 mM                                 | No <sup>15</sup> N labeling.          | 113.5        | 0.368                              | 3.28                 | 274.7         | 0.367                               | 1.99                  | 336.0         | 0.366                               | 2.30                  |
| 5            | Reproductive     | 10 mM                                  |                                       | 207.3        | 0.366                              | 4.10                 | 543.9         | 0.365                               | 2.73                  | 457.7         | 0.364                               | 2.43                  |
| 6            | Reproductive     | 10 mM                                  |                                       | 154.2        | 0.366                              | 4.13                 | 500.6         | 0.366                               | 2.40                  | 426.5         | 0.365                               | 2.49                  |
| 7            | Anthesis         | 0.2 mM                                 |                                       | 93.4         | 0.574                              | 2.72                 | 380.4         | 0.692                               | 1.37                  | 113.1         | 0.685                               | 2.09                  |
| 8            | Anthesis         | 0.2 mM                                 | For <sup>15</sup> N distribution at   | 145.9        | 0.906                              | 2.24                 | 520.3         | 1.135                               | 1.84                  | 73.0          | 1.006                               | 2.40                  |
| 9            | Anthesis         | 0.2 mM                                 | anthesis.                             | 84.2         | 0.813                              | 2.30                 | 292.2         | 1.094                               | 1.61                  | 86.2          | 0.965                               | 2.22                  |
| 10           | Anthesis         | 0.2 mM                                 |                                       | 91.8         | 0.856                              | 2.73                 | 358.2         | 1.076                               | 2.07                  | 117.9         | 0.978                               | 2.32                  |
| 11           | Anthesis         | 0.2 mM                                 |                                       | 77.5         | 0.874                              | 2.70                 | 290.0         | 1.242                               | 2.20                  | 117.6         | 1.076                               | 2.45                  |
| 12           | Reproductive     | 0.01 mM                                |                                       | 184.1        | 0.538                              | 1.59                 | 603.1         | 0.569                               | 0.79                  | 789.6         | 0.641                               | 2.32                  |
| 13           | Reproductive     | 0.01 mM                                | For <sup>15</sup> N distribution at   | 185.4        | 0.557                              | 2.11                 | 633.4         | 0.636                               | 0.84                  | 750.8         | 0.798                               | 2.43                  |
| 14           | Reproductive     | 0.01 mM                                | end of cycle.                         | 91.9         | 0.653                              | 2.27                 | 476.9         | 0.791                               | 0.67                  | 765.3         | 0.804                               | 2.71                  |
| 15           | Reproductive     | 0.01 mM                                |                                       | 101.3        | 0.545                              | 1.54                 | 388.3         | 0.628                               | 0.84                  | 601.8         | 0.626                               | 2.43                  |
| 16           | Reproductive     | 0.01 mM                                |                                       | 197.9        | 0.535                              | 1.80                 | 618.9         | 0.626                               | 0.67                  | 812.0         | 0.623                               | 2.68                  |
| 17           | Reproductive     | 0.2 mM                                 |                                       | 225.0        | 0.404                              | 3.49                 | 1142.0        | 0.417                               | 2.45                  | 1384.0        | 0.510                               | 3.76                  |
| 18           | Reproductive     | 0.2 mM                                 |                                       | 185.0        | 0.443                              | 2.87                 | 906.0         | 0.503                               | 1.63                  | 1491.0        | 0.469                               | 2.79                  |
| 19           | Reproductive     | 0.2 mM                                 | For <sup>15</sup> N distribution at   | 105.0        | 0.490                              | 2.14                 | 684.0         | 0.543                               | 0.80                  | 954.0         | 0.542                               | 2.34                  |
| 20           | Reproductive     | 0.2 mM                                 | end of cycle.                         | 159.0        | 0.488                              | 2.06                 | 748.0         | 0.496                               | 1.14                  | 1323.0        | 0.493                               | 2.88                  |
| 21           | Reproductive     | 0.2 mM                                 |                                       | 303.0        | 0.415                              | 2.72                 | 1293.0        | 0.432                               | 1.82                  | 1810.0        | 0.439                               | 3.60                  |
| 22           | Reproductive     | 0.2 mM                                 |                                       | 186.0        | 0.415                              | 3.24                 | 669.0         | 0.450                               | 1.61                  | 829.0         | 0.546                               | 3.18                  |
| 23           | Reproductive     | 0.2 mM                                 |                                       | 69.0         | 0.515                              | 1.36                 | 276.0         | 0.580                               | 0.91                  | 532.0         | 0.485                               | 2.89                  |
| 24           | Reproductive     | 10 mM                                  |                                       | 217.0        | 0.409                              | 4.00                 | 845.0         | 0.403                               | 3.52                  | 1003.0        | 0.401                               | 4.09                  |
| 25           | Reproductive     | 10 mM                                  |                                       | 229.0        | 0.421                              | 3.78                 | 1245.0        | 0.425                               | 2.42                  | 1858.0        | 0.425                               | 4.27                  |
| 26           | Reproductive     | 10 mM                                  | For <sup>15</sup> N distribution at   | 177.0        | 0.436                              | 2.75                 | 1131.0        | 0.419                               | 2.78                  | 1631.0        | 0.427                               | 3.91                  |
| 27           | Reproductive     | 10 mM                                  | end of cycle.                         | 118.0        | 0.456                              | 3.50                 | 956.0         | 0.450                               | 2.44                  | 1404.0        | 0.441                               | 3.06                  |
| 28           | Reproductive     | 10 mM                                  |                                       | 90.0         | 0.475                              | 1.73                 | 575.0         | 0.433                               | 2.51                  | 1166.0        | 0.432                               | 3.97                  |
| 29           | Reproductive     | 10 mM                                  |                                       | 231.0        | 0.420                              | 2.98                 | 1327.0        | 0.403                               | 2.64                  | 2241.0        | 0.391                               | 4.05                  |
| 30           | Reproductive     | 10 mM                                  |                                       | 176.0        | 0.404                              | 4.30                 | 1068.0        | 0.407                               | 2.76                  | 1928.0        | 0.401                               | 4.29                  |

**Table S3: statistical tests of N fluxes (Figure 5)**

Experimental design and results are presented in Figure 5.

Letters indicate statistical groups (Kruskal-Wallis H test,  $p < 0.05$ ).

Comparisons are presented per line (ie: same letter on different lines do not mean same group).

**Table S3(A) : comparison between N fluxes intensities for each treatment**

| Treatment                            | Remobilization from roots | Remobilization from shoots | Remobilization to spikes | Influx to roots | Influx to shoots | Influx to spikes |
|--------------------------------------|---------------------------|----------------------------|--------------------------|-----------------|------------------|------------------|
| 0.01 mM NO <sub>3</sub> <sup>-</sup> | c                         | d                          | b                        | ac              | a                | b                |
| 0.2 mM NO <sub>3</sub> <sup>-</sup>  | b                         | c                          | d                        | bcd             | acd              | a                |
| 10 mM NO <sub>3</sub> <sup>-</sup>   | c                         | d                          | e                        | de              | a                | b                |

**Table S3(B) : comparison of end of cycle N quantities between plant parts for each treatment**

| Treatment                            | Roots | Shoots | Spikes |
|--------------------------------------|-------|--------|--------|
| 0.01 mM NO <sub>3</sub> <sup>-</sup> | a     | a      | b      |
| 0.2 mM NO <sub>3</sub> <sup>-</sup>  | a     | a      | b      |
| 10 mM NO <sub>3</sub> <sup>-</sup>   | a     | b      | c      |

**Table S3(C) : comparison of N fluxes and quantities between treatments**

|                                                  |             | 0.01 mM NO <sub>3</sub> <sup>-</sup> | 0.2 mM NO <sub>3</sub> <sup>-</sup> | 10 mM NO <sub>3</sub> <sup>-</sup> |
|--------------------------------------------------|-------------|--------------------------------------|-------------------------------------|------------------------------------|
| Total fluxes at the plant level                  | Remob       | b                                    | a                                   | a                                  |
|                                                  | Uptake      | a                                    | b                                   | c                                  |
| Remobilization                                   | from roots  | a                                    | a                                   | a                                  |
|                                                  | from shoots | c                                    | b                                   | a                                  |
|                                                  | to spikes   | b                                    | b                                   | a                                  |
| Influx                                           | to roots    | a                                    | a                                   | a                                  |
|                                                  | to shoots   | a                                    | a                                   | b                                  |
|                                                  | to spikes   | a                                    | b                                   | c                                  |
| End of cycle N quantities                        | Roots       | a                                    | a                                   | a                                  |
|                                                  | Shoots      | a                                    | a                                   | b                                  |
|                                                  | Spikes      | a                                    | b                                   | c                                  |
| End of cycle N distribution (% of total plant N) | Roots       | a                                    | a                                   | a                                  |
|                                                  | Shoots      | a                                    | ab                                  | b                                  |
|                                                  | Spikes      | a                                    | a                                   | a                                  |



**Table S4: primers used for qRT-PCR analyses**

| Name symbol                   | Gene number           | Primer  | Sequence (5'->3')    |
|-------------------------------|-----------------------|---------|----------------------|
| <i>BdNRT2A/B</i>              | <i>Bradi3g01270.1</i> | Forward | GTCGGGTTCCATCTTCTCG  |
|                               | <i>Bradi3g01250.1</i> | Reverse | CCGATGATCTTGCTGTTGAA |
| <i>BdNRT2C</i>                | <i>Bradi3g01290.1</i> | Forward | AAGTACCCCACAAGCAAAGG |
|                               |                       | Reverse | TCCCTTGCTCTTCTCCTCA  |
| <i>BdNRT2D</i>                | <i>Bradi3g01277.1</i> | Forward | GCTTCGGCTTGGCTAATATC |
|                               |                       | Reverse | ACCATGGATACGATGGAGGT |
| <i>BdNRT3.1</i>               | <i>Bradi3g47710.1</i> | Forward | TACGGCCAGACCAAGCTC   |
|                               |                       | Reverse | CCTTGGCAAGTTGCATTATC |
| <i>BdNRT3.2</i>               | <i>Bradi3g47720.1</i> | Forward | TCGCCTTCTTCTTCTTCATC |
|                               |                       | Reverse | GCCTTGCAATAGATTGCTGT |
| <i>Ubi10</i>                  | <i>DV484269</i>       | Forward | TCCACACTCCACTTGGTGCT |
|                               |                       | Reverse | GAGGGTGGACTCCTTTTGGA |
| <i>EF1<math>\alpha</math></i> | <i>DV482887</i>       | Forward | CCATCGATATTGCCTTGTGG |
|                               |                       | Reverse | GTCTGGCCATCCTTGGAGAT |
| <i>UBC18</i>                  | <i>DV481689</i>       | Forward | GGAGGCACCTCAGGTCATTT |
|                               |                       | Reverse | ATAGCGGTCATTGTCTTGCG |
